# Supplementary material for: Impact of protocol‐based physiotherapy on insulin sensitivity and peripheral glucose metabolism in critically ill patients
Source: PubMed Central journal article supplement — J Cachexia Sarcopenia Muscle. 2022 Jan 24;13(2):1045–53. doi: 10.1002/jcsm.12920 (PMC8978012; doi:10.1002/jcsm.12920), 2022-01-24
Supplement: JCSM-13-1045-s001.pdf [file JCSM-13-1045-s001.pdf]

1 Supplement to:  
2 “Impact of protocol-based physiotherapy on insulin sensitivity  
3 and peripheral glucose metabolism in critically ill patients”  
4

5 Niklas M. Carbon (1), Lilian J. Engelhardt (1), Tobias Wollersheim (1,2), Julius J. Grunow (1,2), Claudia  
6 D. Spies (1), Sven Märdian (3), Knut Mai (4), Joachim Spranger (4), Steffen Weber-Carstens (1,2)  
7

8 (1) Charité – Universitätsmedizin Berlin, corporate member of Freie Universität Berlin,  
9 Humboldt-Universität zu Berlin, Department of Anesthesiology and Operative Intensive  
10 Care Medicine (CCM/CVK), Augustenburger Platz 1, 13357 Berlin, Germany

11 (2) Berlin Institute of Health at Charité – Universitätsmedizin Berlin, Charitéplatz 1, 10117 Berlin,  
12 Germany

13 (3) Charité – Universitätsmedizin Berlin, corporate member of Freie Universität Berlin,  
14 Humboldt-Universität zu Berlin, and Berlin Institute of Health, Center for Musculoskeletal  
15 Surgery, Augustenburger Platz 1, 13357 Berlin, Germany

16 (4) Charité – Universitätsmedizin Berlin, corporate member of Freie Universität Berlin,  
17 Humboldt-Universität zu Berlin, and Berlin Institute of Health; Department of Endocrinology  
18 and Metabolism; 10117 Berlin, Germany

19 corresponding author:  
20

21 Prof. Dr. Steffen Weber-Carstens  
22 Steffen.weber-carstens@charite.de  
23 Tel: 0049 30 450 651055

24 Charité – Universitätsmedizin Berlin, corporate member of Freie Universität Berlin, Humboldt-  
25 Universität zu Berlin and Berlin Institute of Health, Department of Anesthesiology and Operative  
26 Intensive Care Medicine (CCM/CVK), Augustenburger Platz 1, 13357 Berlin, Germany  
27

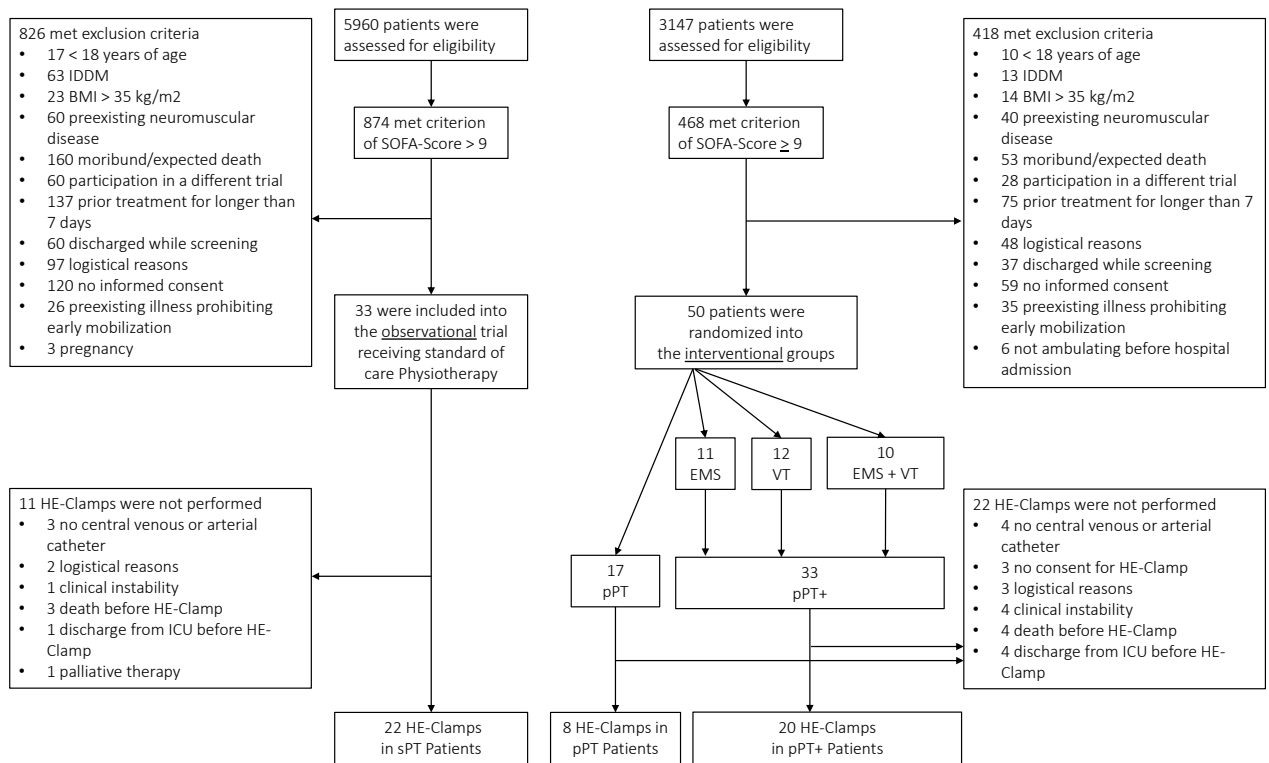

1

2 **Figure S1: Study enrollment scheme for observational and interventional trials**

3 *“HE-clamp”*: Hyperinsulinemic Euglycemic Clamp; *“EMS”*: electrical muscle stimulation; *“VT”*: whole  
 4 body vibration therapy; *“sPT”*: standard physiotherapy; *“pPT”*: protocol-based physiotherapy; *“pPT+”*:  
 5 protocol-based physiotherapy with additional muscle activating measures; *“IDDM”*: insulin dependent  
 6 diabetes mellitus; *“SOFA-Score”* sequential organ failure assessment score

7

1 Measurements

2 Hyperinsulinemic-Euglycemic Clamp (HE-Clamp)

3 According to de Fronzo et al. [10,11] the test is divided in three phases: 1) baseline, 2) titration and 3)  
4 steady state. During baseline patients received a basal glucose infusion of 2 mg/kg/min for 12 hours.  
5 Blood glucose level was kept in the target of 80-140 mg/dl by continuous insulin infusion due to local  
6 ICU standard.

7 During the titration phase, patients received an insulin bolus of 180 mIU/m<sup>2</sup>BSA/min over 30 min,  
8 followed by a continuous insulin infusion of 125 mIU/m<sup>2</sup>BSA/min. The glucose infusion rate was  
9 continuously adjusted until the blood glucose target (80-110 mg/dl) was stable for 30 min, without any  
10 further adjustment of the glucose infusion rate. This point is defined as the steady state in which  
11 glucose infusion corresponds to peripheral glucose uptake (DeFronzo 1979). Plasma insulin  
12 concentration was measured by laboratory from blood samples retrieved during the steady state.

13 Blood measurements were taken from arterial catheters. Glucose infusion was applied by central  
14 venous line. Catheters were established due to clinical indication in these severely ill ICU patients.

15

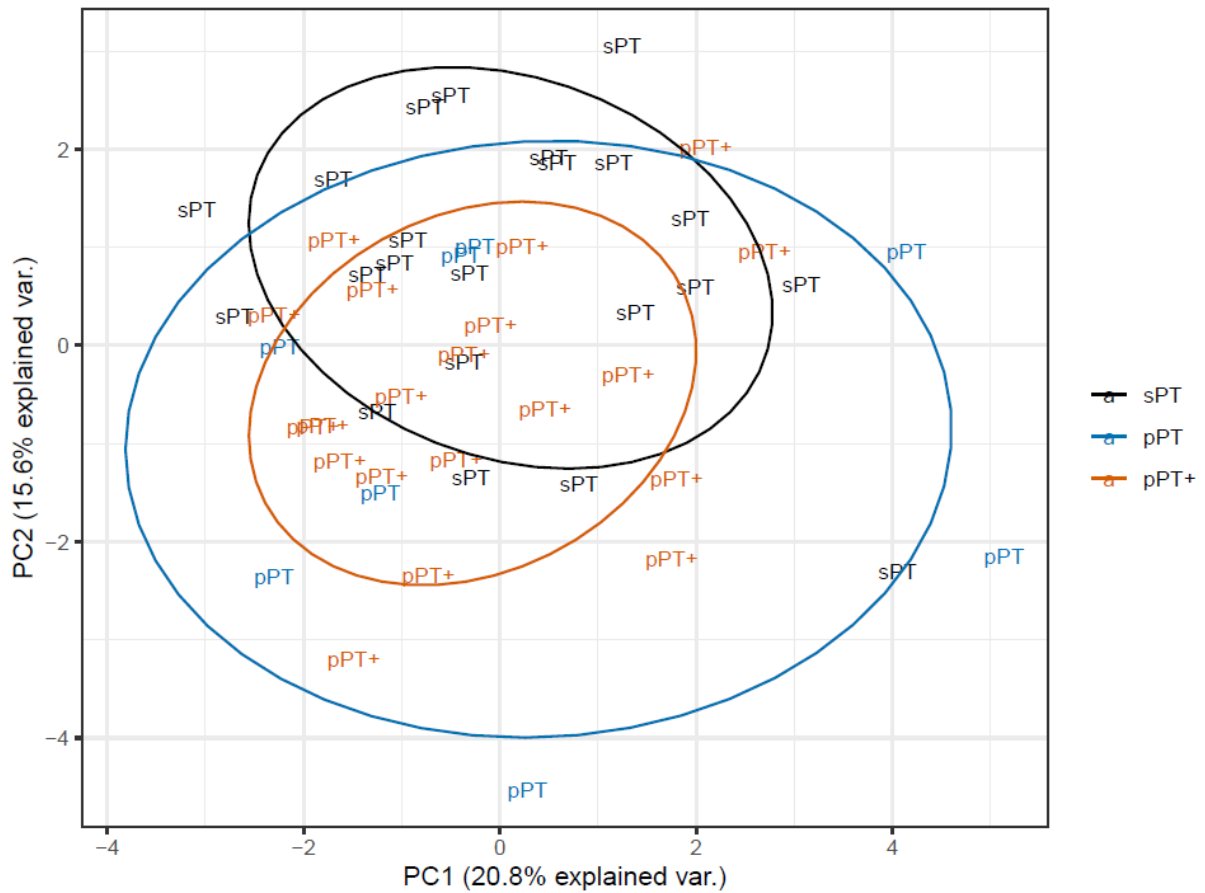

1  
2  
3  
4  
5  
6  
7  
8  
9  
10  
11

**Figure S2: Principal Component Analysis**

*Principal Component Analysis including the following data: age, sex, weight, height, ICU stay before HE-Clamp, event leading to ICU admission, mean sedation level measured by Richmond Agitation and Sedation Scale, SOFA Score on admission, APACHE 2 Score on admission, mean norepinephrine dose before HE-Clamp, days in septic shock, mean dose of nutrition (kcal/kg PBW) before HE-Clamp, Mean insulin dose and fraction of days before HE-Clamp, mean blood glucose level before HE-Clamp. Plot shows good overlap of data, pooling of data is feasible.*

1 **Table S1: Baseline characteristics**

|                                                    |              | sPT<br>n=22         | pPT<br>n=8          | pPT+<br>n=20        | p     |
|----------------------------------------------------|--------------|---------------------|---------------------|---------------------|-------|
| Diagnosis                                          | ARDS/Sepsis  | 15                  | 4                   | 11                  |       |
|                                                    | Polytrauma   | 5                   | 3                   | 5                   |       |
|                                                    | Neuro/others | 2                   | 1                   | 4                   |       |
| Sex                                                | male         | 19                  | 3                   | 14                  |       |
|                                                    | female       | 3                   | 5                   | 6                   |       |
| age (years)                                        |              | 52 (36-69)          | 52.5 (33-64.5)      | 64 (51-69.5)        | 0.070 |
| weight (kg)                                        |              | 83 (78-96)          | 80 (65-85)          | 84 (70-96)          | 0.218 |
| height (m)                                         |              | 1.77 (1.72-1.85)    | 1.74 (1.68-1.75)    | 1.76 (1.68-1.80)    | 0.469 |
| <b>Illness severity scoring at ICU admission</b>   |              |                     |                     |                     |       |
| SOFA                                               |              | 12 (10-14)          | 14 (11-18)          | 13 (11-14)          | 0.438 |
| SAPS2                                              |              | 39.5 (35.0-52.0)    | 55.5 (40.0-70.0)    | 59.5 (52.0-67.0)    | 0.784 |
| APACHE II                                          |              | 18.5 (15.0-25.0)    | 27.5 (18.5-32.0)    | 25.5 (21.5-30.0)    | 0.940 |
| <b>ICU admission to HE-Clamp</b>                   |              |                     |                     |                     |       |
| ICU stay before HE-Clamp (days)                    |              | 16(13-18)           | 17(15.5-24.5)       | 20.5(15.5-22.5)     | 0.940 |
| Fraction Days with septic shock (%)                |              | 14.8 (10.0-35.7)    | 41 (32.5-56.4)      | 20.9 (0.65-58.8)    | 0.087 |
| median blood glucose before HE-Clamp               |              | 125(117-132)        | 133(108-139)        | 133(125-141)        | 0.566 |
| Caloric intake* (kcal/kg PBW)                      |              | 21.5 (17.8-24.5)    | 20.3 (13.0-28.5)    | 17.4 (1.0-25.2)     | 0.709 |
| Insulin* (IU/d)                                    |              | 45.7 (30.4-64.6)    | 38.7 (14.4-56.9)    | 33.8 (18.6-61.5)    | 0.576 |
| fraction of days receiving Insulin before HE-Clamp |              | 0.90 (0.79-1.00)    | 0.91 (0.32-1.00)    | 0.95(0.54-1.00)     | 0.746 |
| Norepinephrine* (µg/kg/min)                        |              | 0.007 (0.000-0.072) | 0.011 (0.005-0.043) | 0.012 (0.003-0.066) | 0.897 |

2

3 *Table showing baseline characteristics in the three therapeutic groups; categorical variables are*  
 4 *presented as count (percentage), metric variables are presented as median (25th/75th percentile);*

5 *\*mean daily dose before HE-clamp; Shown baseline characteristics show no significant differences*  
 6 *between observational and interventional trial;*

7 *Categorical variables are presented as count (percentage), metric variables are presented as median*  
 8 *(25th-75th percentile); \*mean daily dose before HE-Clamp;*

9 *BSA: body surface area; PBW: predicted body weight; p-value determined by Kruskal Wallis*

10

1 **Table S2: Hyperinsulinemic Euglycemic Clamp Setup**

|                                     |              | sPT                    | pPT                 | pPT+                   | p     |
|-------------------------------------|--------------|------------------------|---------------------|------------------------|-------|
|                                     |              | n=22                   | n=8                 | n=20                   |       |
| Plasma Insulin concentration (mU/l) | baseline     | 24.6<br>(11.8-32.0)    | 18,4<br>(9,5; 32,6) | 21.4<br>(10.9-35.6)    | 0.840 |
|                                     | steady state | 158.8<br>(120.7-211.8) | 215<br>(149/ 237,5) | 200.6<br>(169.0-230.0) | 0.214 |
| Glucose infusion rate (mg/kg/min)   | baseline     | 2 (2-2)                | 2 (2/ 2)            | 2 (2-2)                | 0.636 |
|                                     | steady state | 5.3<br>(4.4-7.7)       | 6,4<br>(3,9/ 6,8)   | 6.4 (4.9-7.2)          | 0.747 |
| Blood Glucose concentration (mg/dl) | baseline     | 124<br>(116-145)       | 138<br>(109/ 161)   | 129<br>(123-158)       | 0.691 |
|                                     | steady state | 85<br>(81-96)          | 99<br>(90/ 102)     | 93<br>(87-98)          | 0.078 |
| Blood Lactate concentration (mg/dl) | baseline     | 0.8<br>(0.6-1.6)       | 1.1<br>(0.9-1.7)    | 1.0<br>(0.8-1.5)       | 0.414 |
|                                     | steady state | 0.9<br>(0.8-1.2)       | 1.2<br>(1.0-2.0)    | 1.3<br>(0.9-1.5)       | 0.195 |

2

3 *Table showing hyperinsulinemic euglycemic Clamp setup in critically ill patients in the three*  
 4 *therapeutic groups. No group difference could be observed. Setup and execution of the*  
 5 *hyperinsulinemic euglycemic Clamp is consistent over all three patient groups of the two included*  
 6 *studies; variables are presented as median (25th/75th percentile); p-value determined by Kruskal*  
 7 *Wallis*

8

9 When comparing the results of the ICU measurements to healthy controls the modification of the  
 10 standard HE-clamp led to similar steady state glucose infusion rates or M values (median M value in  
 11 pooled ICU patients 5.72 (4.37/ 7.20) mg/k1g/min vs all healthy controls 6.0 (5.07/ 6.35) mg/kg/min  
 12 p=n.s.), representing a similar net glucose uptake into the insulin dependent tissue. On the other hand,  
 13 the modification of the HE-clamp led to a higher baseline and steady state plasma insulin concentration  
 14 (median baseline plasma insulin concentration in pooled ICU patients 21.08 (11.71/ 34.34) mU/l vs  
 15 healthy controls 3.71 (3.39/ 4.55) p=0.002 and median steady state plasma insulin concentration in  
 16 pooled ICU patients 192.08 (143.47/ 233.21) vs. all healthy controls 57.70 (54.67/ 63.92) mU/l  
 17 p<0.001). The two distinct levels of relatively low and high insulin plasma concentrations could be  
 18 achieved in all three ICU patient groups (baseline versus steady state: sPT p<0.001; pPT p=0.012; pPT+  
 19 p<0.001).

1 **Table S3: Microdialysis of the m. vastus lateralis during HE-Clamp**

|                              |                                        | sPT<br>n=17            | pPT<br>n=8            | pPT+<br>n=20           | Kruskal-Wallis<br>(sPT, pPT, pPT+)<br>p | healthy<br>controls<br>n=4 |
|------------------------------|----------------------------------------|------------------------|-----------------------|------------------------|-----------------------------------------|----------------------------|
| <b>Glucose<br/>(mmol/l)</b>  | baseline                               | 4.67<br>(3.8/5.52)     | 3.6<br>(2.52/4.52)    | 3.22<br>(2.06/4.03)    | 0.079                                   | 3.19<br>(3.06/3.4)         |
|                              | steady state                           | 2.68<br>(2.16/2.95)    | 2.06<br>(1.66/2.63)   | 1.71<br>(1.17/2.1)     | 0.019*                                  | 2.8<br>(1.88/3.22)         |
|                              | relative<br>change                     | -0.43<br>(-0.48/-0.28) | -0.4<br>(-0.45/-0.24) | -0.45<br>(-0.57/-0.22) | 0.591                                   | -0.13<br>(-0.41/-0.01)     |
|                              | recovery<br>rate                       | 0.73<br>(0.52/0.92)    | 0.77<br>(0.6/0.82)    | 0.68<br>(0.62/0.84)    | 0.981                                   | -                          |
|                              | steady state<br>(corrected)            | 3,75<br>(2,99/4,81)    | 3,31<br>(2,64/4,11)   | 2,74<br>(1,77/3,48)    | 0.037*                                  | -                          |
|                              | <b>Lactate<br/>(mmol/l)</b>            | baseline               | 2.35<br>(1.8/2.98)    | 2.05<br>(1.35/3.04)    | 2.25<br>(1.45/3.23)                     | 0.864                      |
|                              | steady state                           | 2.4<br>(2.02/2.51)     | 2.24<br>(1.62/2.81)   | 2.39<br>(1.88/3.69)    | 0.737                                   | 2.03<br>(1.89/2.45)        |
|                              | relative<br>change                     | 0.07<br>(-0.13/0.31)   | -0.06<br>(-0.22/0.59) | 0.21<br>(-0.05/0.39)   | 0.669                                   | 0.26<br>(0.14/0.4)         |
|                              | recovery<br>rate                       | 0.93<br>(0.78/1)       | 0.82<br>(0.77/1.16)   | 0.82<br>(0.73/1.09)    | 0.53                                    | -                          |
|                              | steady state<br>(corrected)            | 2.57<br>(2.27/3.22)    | 2.77<br>(1.73/3.38)   | 3.29<br>(2.21/4.36)    | 0.303                                   | -                          |
| <b>Pyruvate<br/>(µmol/l)</b> | baseline                               | 65.4<br>(57.7/115.5)   | 78<br>(56.8/127.3)    | 65.2<br>(45.7/101.5)   | 0.532                                   | 47<br>(41.5/54.5)          |
|                              | steady state                           | 67.8<br>(51.6/113.9)   | 81.5<br>(48.6/119.2)  | 82.3<br>(56.2/113.7)   | 0.924                                   | 117<br>(95/154.5)          |
|                              | relative<br>change                     | 0.05<br>(-0.18/0.17)   | -0.06<br>(-0.36/0.09) | 0.06<br>(-0.17/0.61)   | 0.371                                   | 1.84<br>(1.05/2.15)        |
|                              | recovery<br>rate                       | 0.85<br>(0.67/1.02)    | 0,77<br>(0,74/1,37)   | 0.82<br>(0.62/1)       | 0.964                                   | -                          |
|                              | steady state<br>(corrected)            | 100.9<br>(71.8/110)    | 64.2<br>(45.4/161.2)  | 102.7<br>(69.6/139)    | 0.814                                   | -                          |
|                              | <b>Lactate/<br/>Pyruvate<br/>Ratio</b> | baseline               | 30<br>(22.8/36.4)     | 25.1<br>(23.2/33.2)    | 33.1<br>(22.6/49.1)                     | 0.693                      |
| steady state                 |                                        | 32.5<br>(21.5/43)      | 25.9<br>(22.6/30.8)   | 30.7<br>(23.3/46.7)    | 0.755                                   | 16.1<br>(15.3/21.8)        |
| relative<br>change           |                                        | 0.09<br>(-0.13/0.27)   | 0.07<br>(-0.16/0.31)  | -0.06<br>(-0.19/0.16)  | 0.729                                   | -0.52<br>(-0.56/-0.42)     |
| <b>Glycerol<br/>(µmol/l)</b> | baseline                               | 122<br>(28.6/172.8)    | 64.7<br>(37.3/120.3)  | 55.2<br>(35.4/76.1)    | 0.145                                   | 98<br>(72/141)             |
|                              | steady state                           | 34.7<br>(25/70)        | 57.1<br>(22/109.7)    | 42.6<br>(29.8/51.5)    | 0.822                                   | 25<br>(18.5/30)            |
|                              | relative<br>change                     | -0.39<br>(-0.8/-0.12)  | -0.21<br>(-0.33/0.07) | -0.21<br>(-0.44/-0.03) | 0.257                                   | -0.74<br>(-0.87/-0.58)     |
|                              | recovery<br>rate                       | 0.92<br>(0.61/1.12)    | 0.85 (0.68/1.08)      | 0.87<br>(0.74/0.95)    | 0.991                                   | -                          |
|                              | steady state<br>(corrected)            | 54<br>(32.1/76.8)      | 73.1<br>(34.5/118.3)  | 48<br>(30:3/65:8)      | 0.564                                   | -                          |

2 *Table showing dialysate concentrations at baseline and steady state of the hyperinsulinemic*  
3 *euglycemic Clamp in critically ill patients divided by the three therapeutic groups. “sPT”: standard*  
4 *physiotherapy; “pPT”: protocol-based physiotherapy; “pPT+”: protocol-based physiotherapy with*  
5 *additional muscle activating measures. Variables are presented as median (25th/75th percentile); p-*  
6 *value determined by Kruskal Wallis between sPT pPT and pPT+, results of four healthy individuals are*  
7 *shown as reference.*

1 **Table S4:** Impact of predictors on Strength measured by MRC Score at discharge - Results  
 2 of the linear Regression Analysis

| <b>Predictor</b>                 | <b>Unstandardized<br/>Regression<br/>Coefficient</b> | <b>Standard<br/>Error</b> | <b>Standardized<br/>Coefficient<br/>Beta</b> | <b>t</b>     | <b>Signifi<br/>cance</b> |
|----------------------------------|------------------------------------------------------|---------------------------|----------------------------------------------|--------------|--------------------------|
| Constant                         | 2.862                                                | 1.207                     | -                                            | 2.371        | 0.025                    |
| Age                              | -0.002                                               | 0.009                     | -0.04                                        | -0.224       | 0.824                    |
| BMI                              | 0.006                                                | 0.033                     | 0.031                                        | 0.177        | 0.861                    |
| Sex                              | 0.281                                                | 0.393                     | -0.132                                       | -0.714       | 0.481                    |
| SOFA Score on admission          | -0.012                                               | 0.048                     | -0.045                                       | -0.247       | 0.807                    |
| <b>Insulin Sensitivity Index</b> | <b>18.671</b>                                        | <b>8.368</b>              | <b>0.484</b>                                 | <b>2.231</b> | <b>0.034*</b>            |

3 *Results of the linear regression. Dependent Variable: MRC at discharge. \* indicates  $p < 0.05$ . While all*  
 4 *input variables correlate with muscle weakness measured by MRC Score at discharge, only Insulin*  
 5 *sensitivity index has an independent impact.*

6

7
